# Supplementary material for: Metal Coordination Properties of a Chromophoric Desferrioxamine (DFO) Derivative: Insight on the Coordination Stoichiometry and Thermodynamic Stability of Zr4+ Complexes
Source: MDPI journal article supplement (doi:10.3390/molecules27010184), 2021-12-29
Supplement: s1 [file s1]

## Supplementary Material

### Metal coordination properties of a chromophoric Desferrioxamine (DFO) derivative. Insight on the coordination stoichiometry and thermodynamic stability of $\text{Zr}^{4+}$ complexes.

By Matteo Savastano, Francesca Boscaro and Antonio Bianchi

|                                                                                                                                                               |     |
|---------------------------------------------------------------------------------------------------------------------------------------------------------------|-----|
| <b>Fig. S1.</b> Distribution diagrams of the species formed by DFO-Pm and DFO as a function of pH. ....                                                       | S2  |
| <b>Fig. S2.</b> pH dependence of Uv-vis spectra of DFO-Pm. ....                                                                                               | S3  |
| <b>Fig. S3.</b> Uv-vis spectral variations upon addition of $\text{Cu}^{2+}$ to a DFO-Pm solution. ....                                                       | S4  |
| <b>Fig. S4.</b> Distribution diagram of the complexes formed by DFO-Pm with $\text{Cu}^{2+}$ . ....                                                           | S5  |
| <b>Fig. S5.</b> Comparison between the pH dependence of the absorbances of solutions containing DFO-Pm and $\text{Cu}^{2+}$ in 1:1 and 1:2 molar ratios. .... | S6  |
| <b>Fig. S6.</b> UV-vis absorption spectra of a DFO-Pm solution upon addition of increasing amounts of $\text{Zn}^{2+}$ ....                                   | S7  |
| <b>Fig. S7.</b> Variation with equivalents of added $\text{Zn}^{2+}$ or $\text{Zr}^{4+}$ of the absorptions at 327 nm of DFO-Pm. ....                         | S8  |
| <b>Fig. S8.</b> Isotopic distribution introduced by the presence of 1 or more $\text{Zr}^{4+}$ ions. ....                                                     | S9  |
| <b>Fig. S9.</b> MS-MS spectra showing how the 2:3 peak is broken down into 1:2, 1:1 and $\text{Zr}^{4+}$ -free L. ....                                        | S10 |
| <b>Fig. S10.</b> Outlook of experiment a) in ref. 13. ....                                                                                                    | S11 |
| <b>Fig. S11.</b> Outlook of experiment b) in ref. 13. ....                                                                                                    | S12 |
| <b>Fig. S12.</b> Outlook of experiment c) in ref. 13. ....                                                                                                    | S13 |

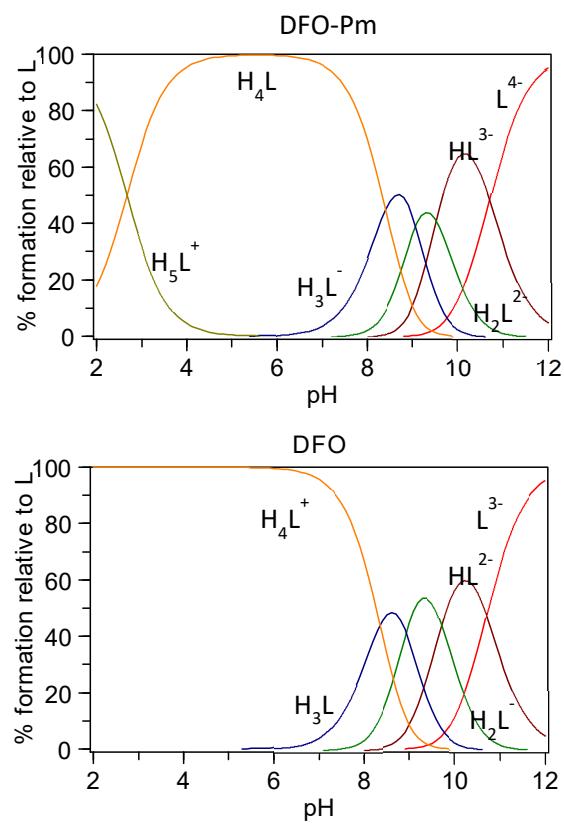

**Figure S1.** Distribution diagrams of the species formed by DFO-Pm ( $H_4L$ ) and DFO ( $H_3L$ ) as a function of pH.  $[DFO-Py] = [DFO] = 1 \times 10^{-3}$  M.

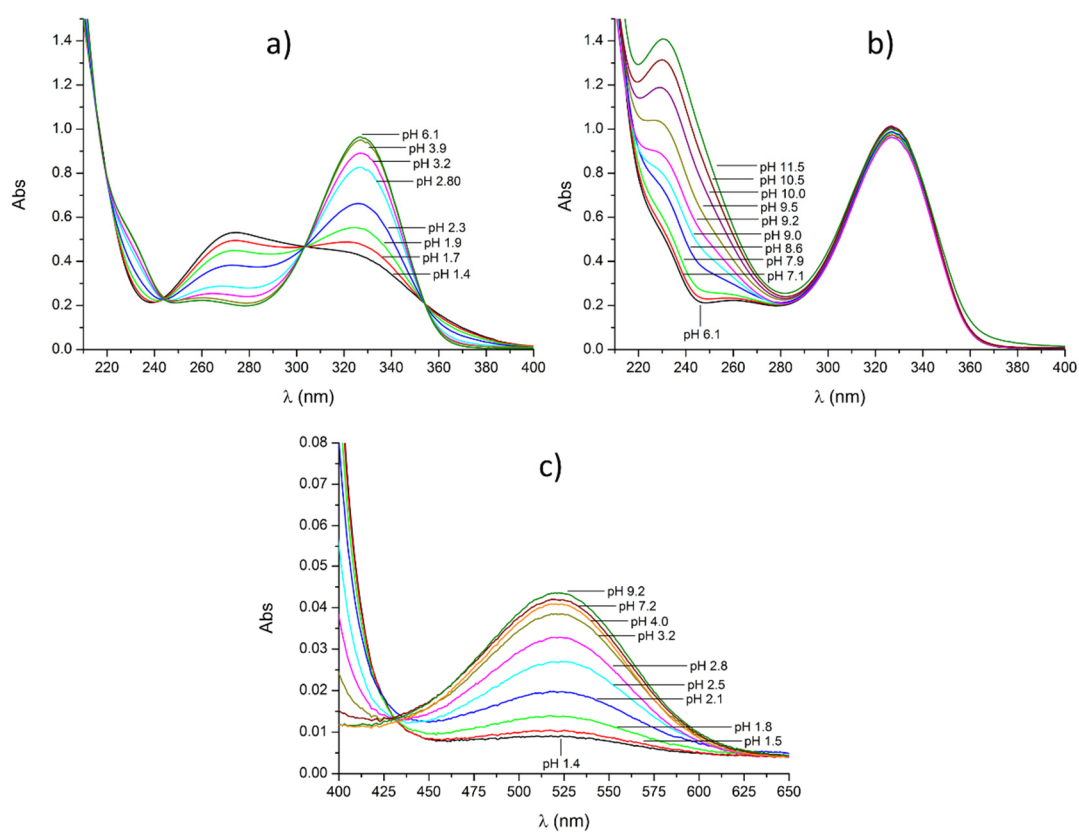

**Figure S2.** Uv-vis spectra of DFO-Pm in the pH ranges: a) 1.4-6.2, b) 6.1-11.5. c) Spectra in the Vis region, pH 1.5-9.2.  $[\text{DFO-Pm}] = 4.25 \times 10^{-5}$  M.

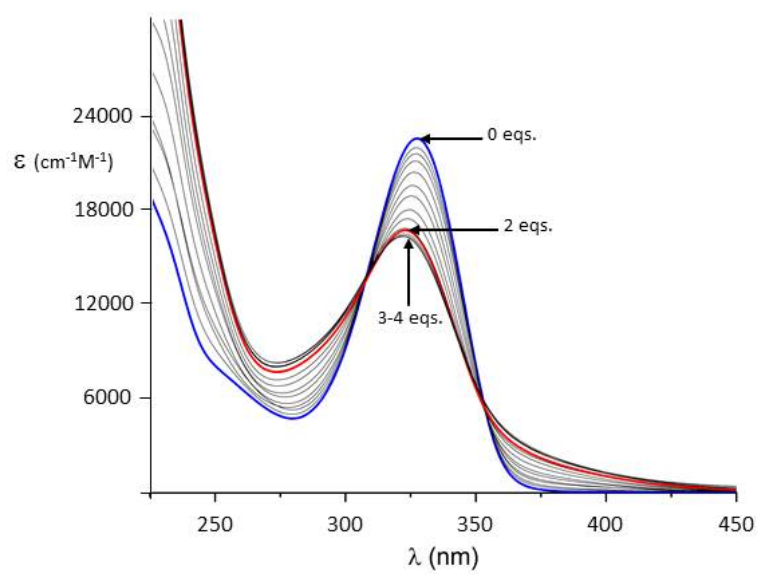

**Figure S3.** Uv-vis spectral variations upon addition of  $\text{Cu}^{2+}$  to a DFO-Pm solution ( $4.25 \times 10^{-5}\text{M}$ , pH 6).

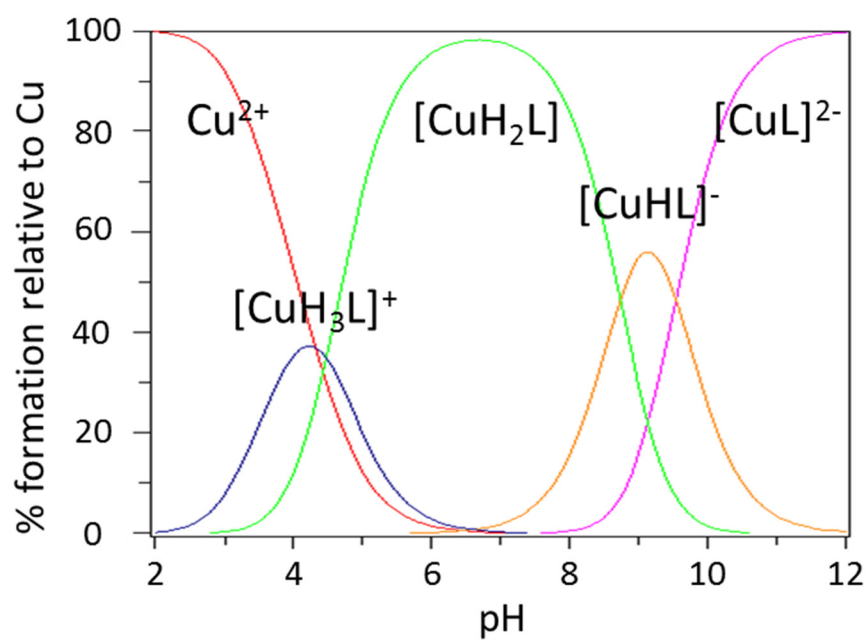

**Figure S4.** Distribution diagram of the complexes formed by DFO-Pm with  $\text{Cu}^{2+}$ .  $[\text{DFO-Pm}] = [\text{Cu}^{2+}] = 4.25 \times 10^{-5}$  M.

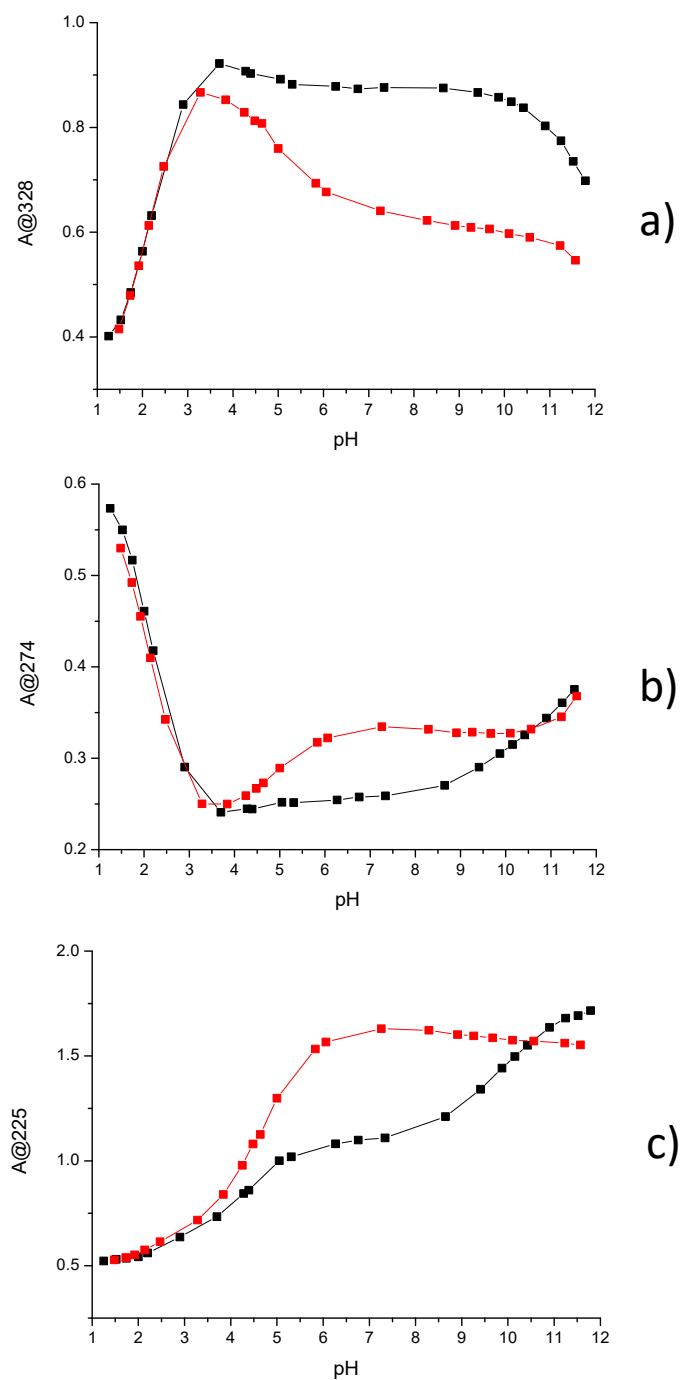

**Figure S5.** Comparison between the pH dependence of the absorbances at 328 nm (a), 274 nm (b) and 225 nm (c) of solutions containing DFO-Pm  $4.25 \times 10^{-5}$  M and  $\text{Cu}^{2+}$   $4.25 \times 10^{-5}$  M (black squares) or  $8.5 \times 10^{-5}$  M (red squares).

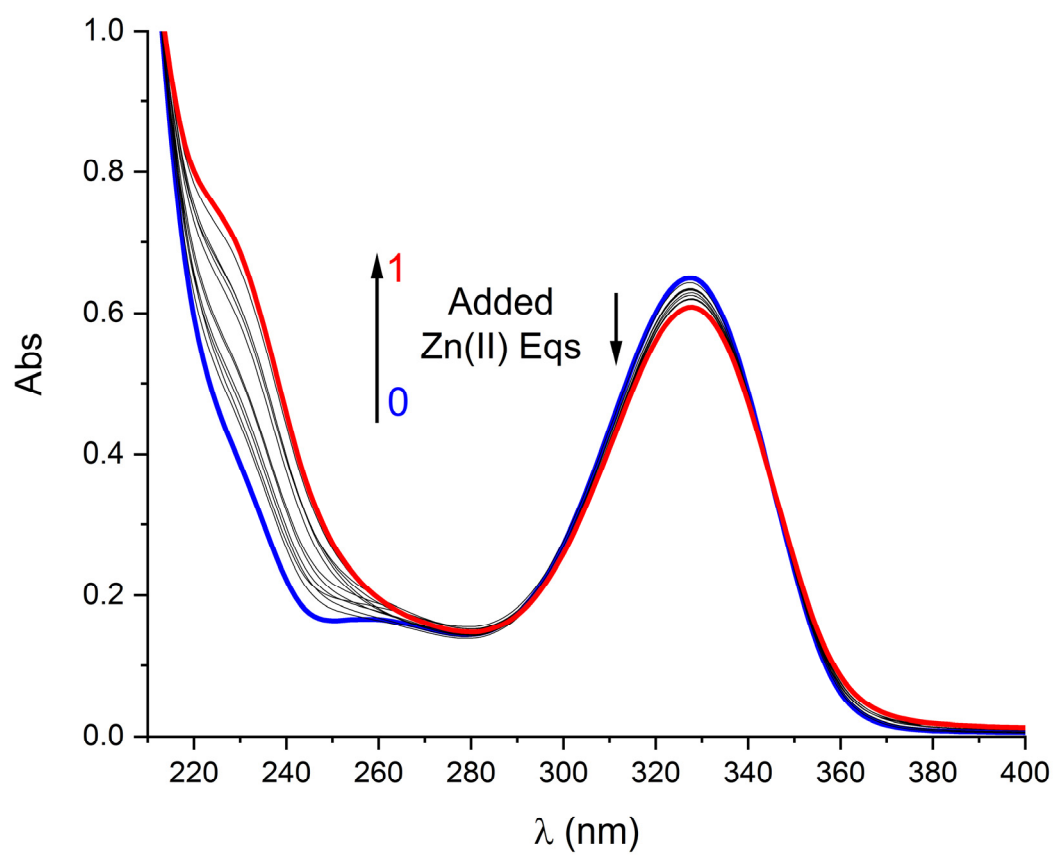

**Figure S6.** UV-vis absorption spectra of a DFO-Pm solution ( $3 \times 10^{-5}$  M, pH 8) upon addition of increasing amounts of  $\text{Zn}^{2+}$ .

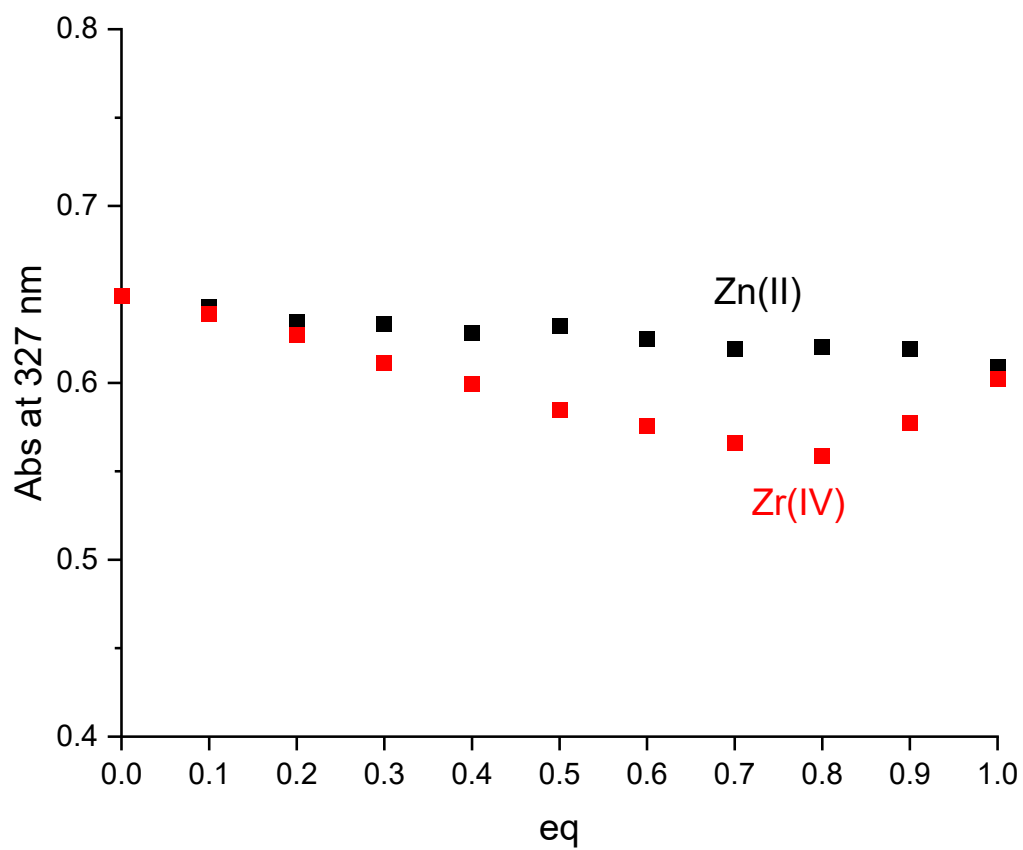

**Figure S7.** Variation with equivalents of added  $\text{Zn}^{2+}$  (pH 8.0) or  $\text{Zr}^{4+}$  (pH 6.0) of the absorptions at 327 nm.  $[\text{DFO-Pm}] = 3 \times 10^{-5} \text{ M}$ .



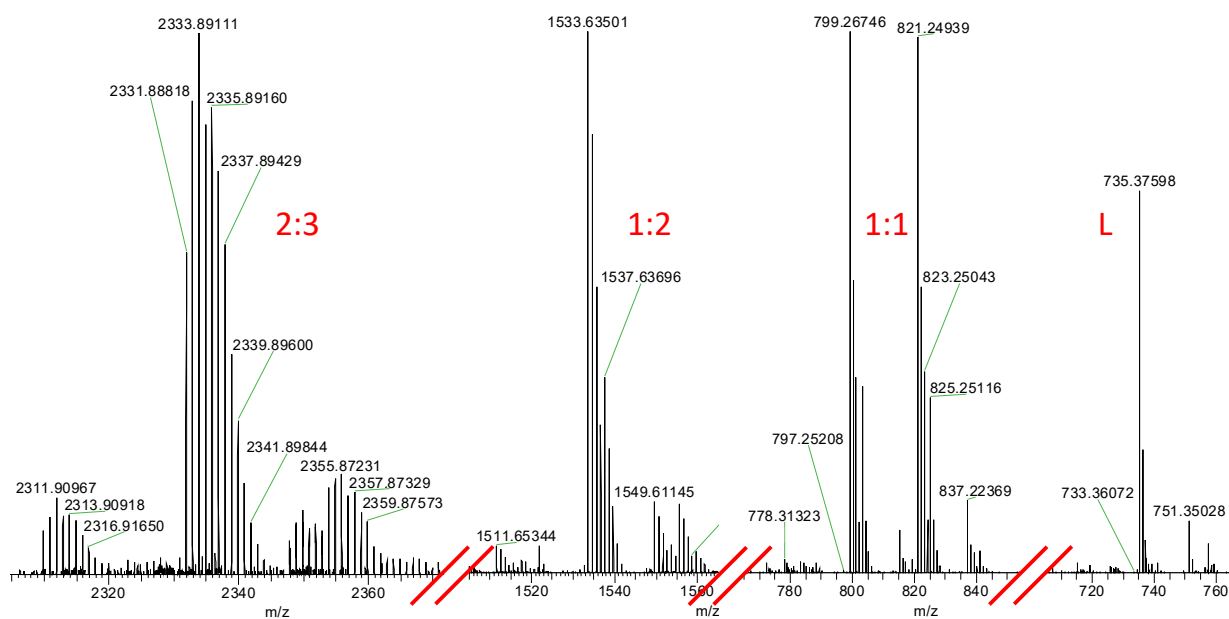

**Figure S8.** An example of the characteristic isotopic distribution introduced by the presence of 1 or more Zr(IV) ions, aiding peaks assignment.

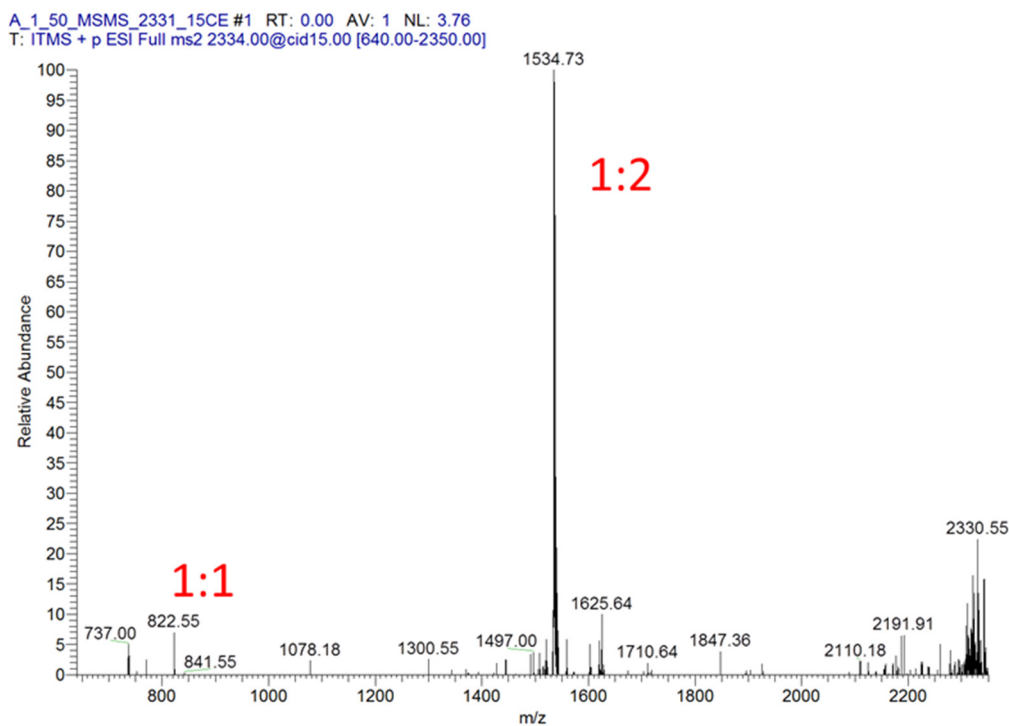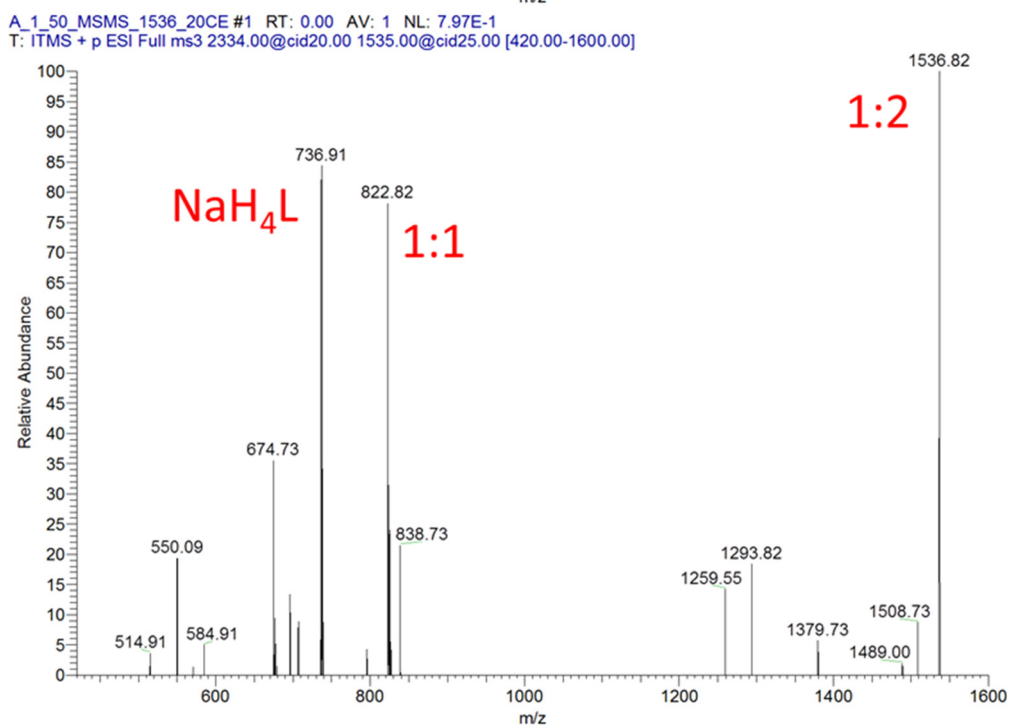

**Figure S9.** Top: MS-MS spectra showing how the 2:3 peak (m/z 2331) is broken down into 1:2, 1:1 and L not coordinated to Zr(IV). Bottom: 1:2 peak (m/z 1536) can be broken down into 1:1 and L not coordinated to Zr(IV) as well.

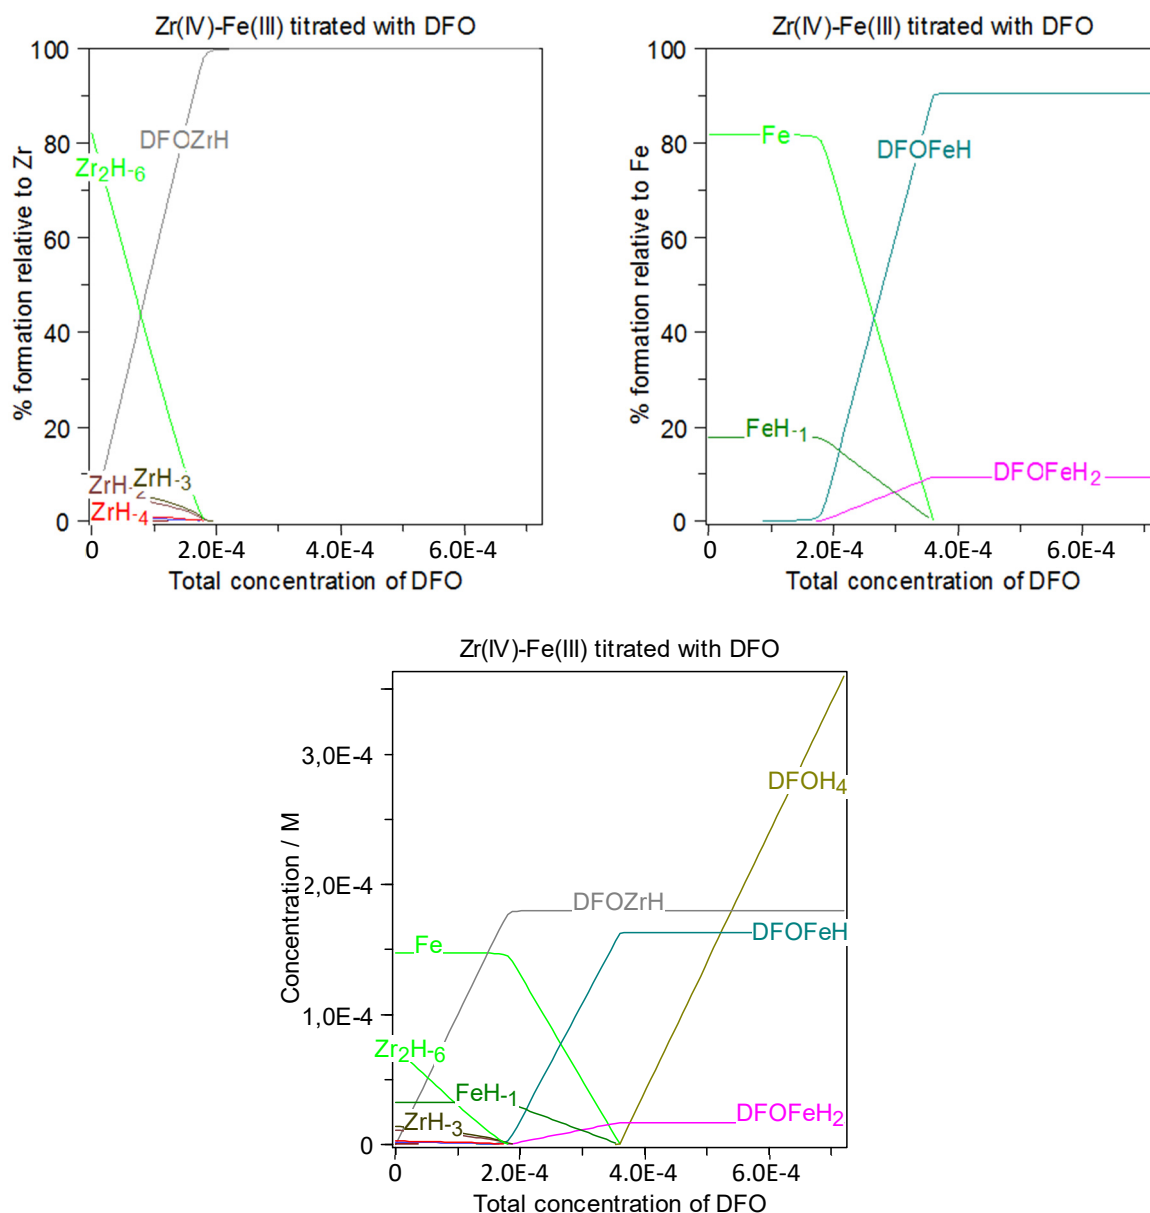

**Figure S10.** Outlook of experiment a): 1:1  $\text{Fe}^{3+}:\text{Zr}^{4+}$  solution titrated with increasing equivalents of DFO (0 to 4 eqs). Concentrations and full thermodynamic set of constants from ref 13. Top left: the first equivalent of DFO selectively and exhaustively binds  $\text{Zr}^{4+}$  (no spectral changes involved). Top right: the second equivalent of DFO exhaustively binds  $\text{Fe}^{3+}$  (all spectral change must happen here). Bottom: global outlook of the experiment showing no  $\text{Fe}^{3+}/\text{Zr}^{4+}$  competition for DFO and end of the experiments at 2 added equivalents of DFO (last two equivalents of ligand remain free and cause no spectral change). Progressive spectral changes from 0 to 4 equivalents were instead reported (Figure 3 of ref. 13).

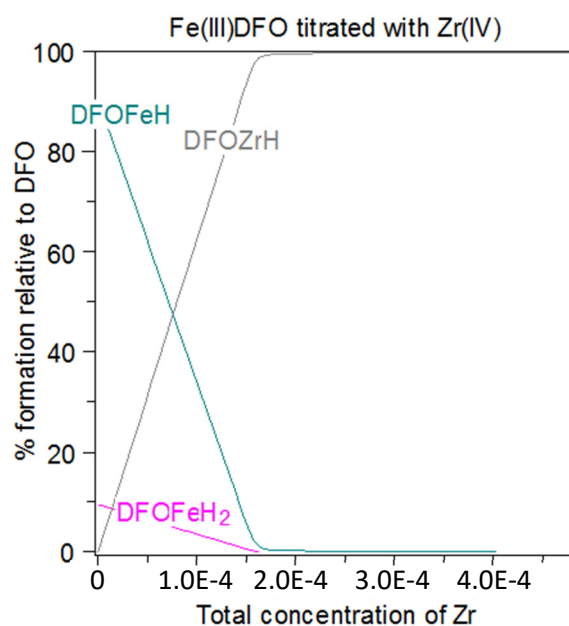

**Figure S11.** Outlook of experiment b): 1:1  $\text{Fe}^{3+}$ :DFO solution titrated with  $\text{Zr}^{4+}$  (0 to 3 eqs). Concentrations and full thermodynamic set of constants from ref 13. 1 equivalent of  $\text{Zr}^{4+}$  should displace  $\text{Fe}^{3+}$  entirely causing discoloration of the solution. Spectral changes were instead observed up to 3 eqs of added  $\text{Zr}^{4+}$  (ref. 13). No  $\text{Fe}^{3+}/\text{Zr}^{4+}$  competition is present in any case:  $\text{Zr}^{4+}$  quantitatively displaces the Fe(III) complex.

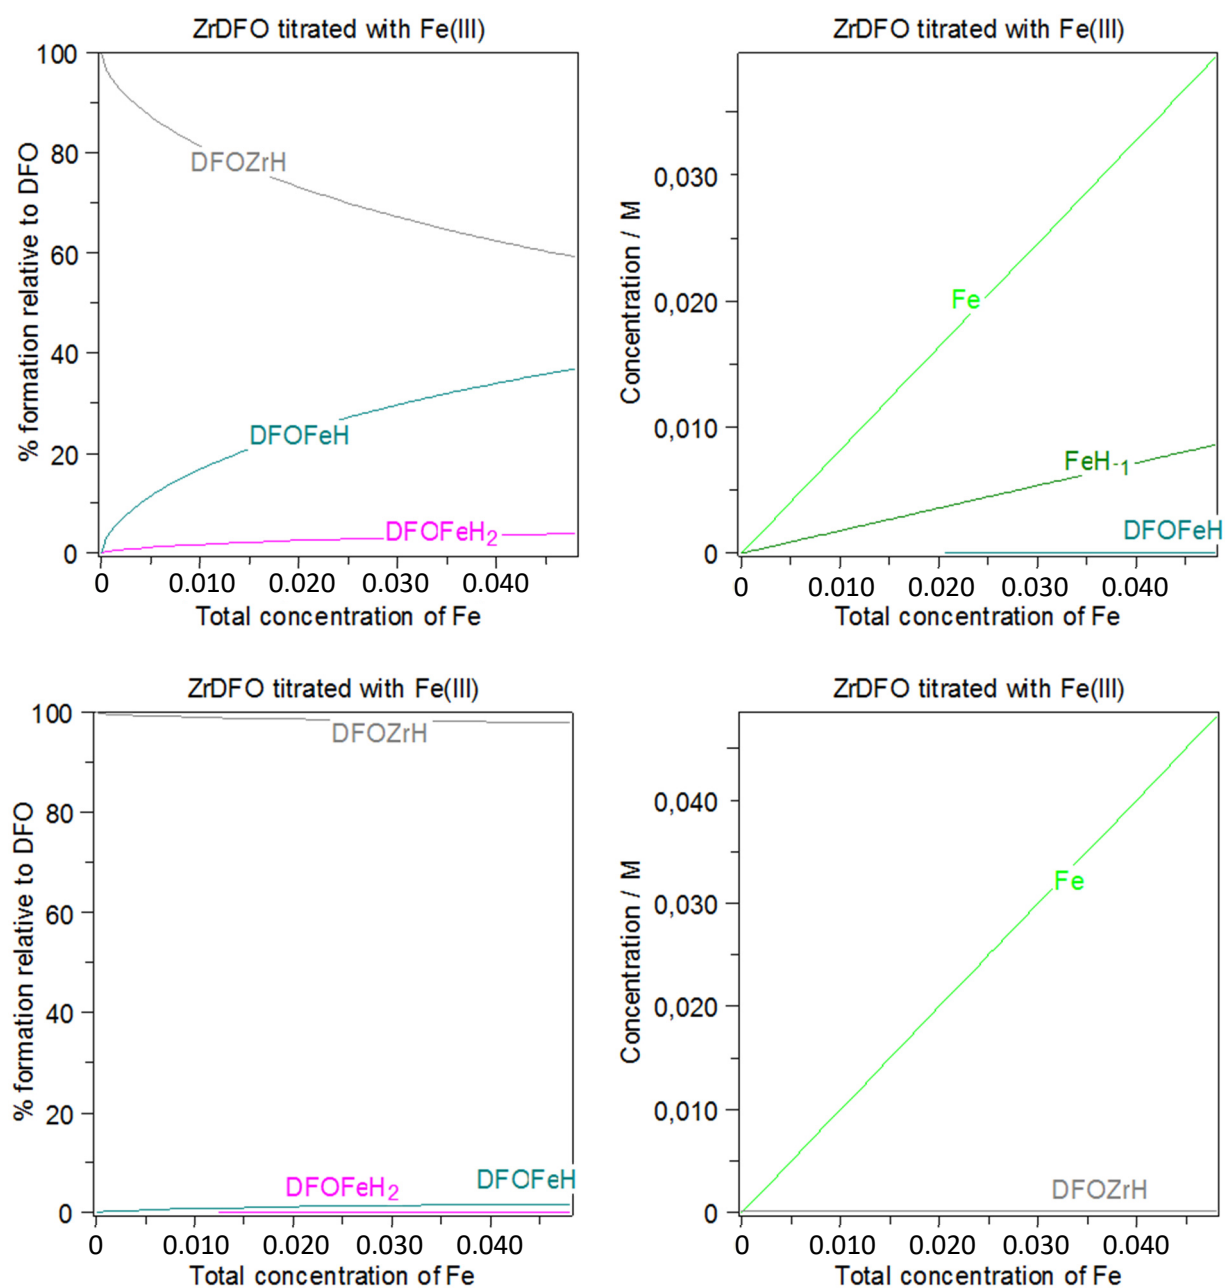

**Figure S12.** Outlook of experiment c): 1:1  $\text{Zr}^{4+}$ :DFO solution titrated with  $\text{Fe}^{3+}$  (0 to 300 eqs). Concentrations and full thermodynamic set of constants from ref 13. Top: the real experiment displaying competition (the hydrolysis of  $\text{Fe}^{3+}$  and  $\text{Zr}^{4+}$  has been included in calculations). Bottom: same experiment ignoring hydrolytic equilibria for both metals: no dissociation of ZrDFO complex should occur, because  $\text{Fe}^{3+}$  does not compete with  $\text{Zr}^{4+}$  for DFO.
